# Supplementary material for: Mendelian randomization study updates the effect of 25-hydroxyvitamin D levels on the risk of multiple sclerosis
Source: Springer Nature journal article supplement (doi:10.1186/s12967-021-03205-6), 2022-01-03
Supplement: MOESM1 [file 19991636]

**Supplementary table 1.** Main characteristics of 115 independent vitamin D genetic variants.

|    | SNP         | chr | position  | EA | NEA | EAF   | <i>P</i> val | Beta   | SE    |
|----|-------------|-----|-----------|----|-----|-------|--------------|--------|-------|
| 1  | rs35408430  | 1   | 17560195  | T  | C   | 0.342 | 5.82E-25     | -0.021 | 0.002 |
| 2  | rs2642439   | 1   | 220970499 | G  | A   | 0.685 | 6.18E-12     | -0.015 | 0.002 |
| 3  | rs79687284  | 1   | 214150821 | C  | G   | 0.035 | 3.77E-08     | -0.030 | 0.005 |
| 4  | rs12123821  | 1   | 152179152 | T  | C   | 0.048 | 3.71E-63     | 0.077  | 0.005 |
| 5  | rs2131925   | 1   | 63025942  | T  | G   | 0.644 | 2.43E-27     | -0.022 | 0.002 |
| 6  | rs61816766  | 1   | 152319572 | C  | T   | 0.029 | 2.75E-49     | 0.087  | 0.006 |
| 7  | rs6672758   | 1   | 230303512 | T  | C   | 0.801 | 7.16E-11     | 0.016  | 0.002 |
| 8  | rs512083    | 1   | 46027355  | C  | T   | 0.461 | 6.56E-10     | 0.012  | 0.002 |
| 9  | rs6671730   | 1   | 417580    | A  | G   | 0.434 | 2.25E-14     | -0.015 | 0.002 |
| 10 | rs7528419   | 1   | 109817192 | G  | A   | 0.225 | 1.34E-17     | 0.020  | 0.002 |
| 11 | rs10908469  | 1   | 155468732 | C  | A   | 0.270 | 6.67E-13     | 0.016  | 0.002 |
| 12 | rs7522116   | 1   | 41835685  | T  | C   | 0.566 | 2.58E-10     | -0.013 | 0.002 |
| 13 | rs79598313  | 1   | 27284913  | T  | C   | 0.023 | 1.13E-08     | -0.037 | 0.006 |
| 14 | rs1260326   | 2   | 27730940  | C  | T   | 0.607 | 3.95E-29     | 0.022  | 0.002 |
| 15 | rs13011615  | 2   | 21274167  | T  | A   | 0.135 | 4.04E-09     | 0.017  | 0.003 |
| 16 | rs6723486   | 2   | 58979783  | T  | C   | 0.611 | 4.24E-08     | -0.011 | 0.002 |
| 17 | rs7569755   | 2   | 118648261 | A  | G   | 0.291 | 1.21E-09     | 0.013  | 0.002 |
| 18 | rs1047891   | 2   | 211540507 | A  | C   | 0.316 | 2.58E-09     | -0.013 | 0.002 |
| 19 | rs2012736   | 2   | 234622379 | A  | C   | 0.081 | 1.10E-40     | -0.048 | 0.004 |
| 20 | rs6724965   | 2   | 101440151 | G  | A   | 0.171 | 1.76E-10     | -0.017 | 0.003 |
| 21 | rs6547409   | 2   | 21190209  | T  | C   | 0.050 | 6.57E-10     | 0.028  | 0.005 |
| 22 | rs58387006  | 2   | 32579999  | C  | A   | 0.222 | 6.33E-09     | -0.014 | 0.002 |
| 23 | rs34186890  | 3   | 141720712 | G  | A   | 0.260 | 2.25E-11     | -0.015 | 0.002 |
| 24 | rs2246832   | 3   | 49881134  | T  | A   | 0.501 | 1.87E-18     | 0.017  | 0.002 |
| 25 | rs113642272 | 3   | 85579472  | T  | G   | 0.636 | 1.73E-21     | -0.020 | 0.002 |
| 26 | rs11458206  | 3   | 125125159 | TG | T   | 0.272 | 1.18E-09     | 0.014  | 0.002 |
| 27 | rs10028494  | 4   | 69970937  | C  | A   | 0.225 | 5.18E-33     | 0.028  | 0.002 |
| 28 | rs6834488   | 4   | 88178919  | T  | C   | 0.424 | 1.96E-13     | -0.015 | 0.002 |
| 29 | rs4616820   | 4   | 57745481  | T  | C   | 0.465 | 5.32E-10     | -0.012 | 0.002 |
| 30 | rs2579309   | 4   | 72077830  | A  | G   | 0.067 | 6.23E-09     | 0.023  | 0.004 |
| 31 | rs36102036  | 4   | 72912236  | A  | G   | 0.345 | 8.71E-60     | 0.034  | 0.002 |
| 32 | rs1352846   | 4   | 72617775  | G  | A   | 0.291 | 1.00E-200    | -0.193 | 0.002 |
| 33 | rs189407772 | 4   | 100146674 | G  | A   | 0.023 | 1.02E-15     | 0.053  | 0.007 |
| 34 | rs10084913  | 4   | 72338030  | G  | A   | 0.134 | 8.73E-11     | 0.019  | 0.003 |
| 35 | rs4364259   | 4   | 15892159  | A  | G   | 0.202 | 2.23E-11     | 0.017  | 0.002 |
| 36 | rs78649910  | 4   | 3482213   | A  | T   | 0.106 | 1.57E-09     | -0.019 | 0.003 |
| 37 | rs3890624   | 4   | 166251068 | G  | A   | 0.395 | 3.19E-08     | 0.011  | 0.002 |
| 38 | rs1966478   | 5   | 118627319 | C  | T   | 0.693 | 6.92E-09     | -0.012 | 0.002 |

|    |             |    |           |   |   |       |           |        |       |
|----|-------------|----|-----------|---|---|-------|-----------|--------|-------|
| 39 | rs2608984   | 6  | 131918839 | T | A | 0.165 | 2.79E-15  | -0.021 | 0.003 |
| 40 | rs72834856  | 6  | 22801858  | G | T | 0.072 | 4.86E-10  | -0.024 | 0.004 |
| 41 | rs11751024  | 6  | 32586236  | A | C | 0.397 | 3.76E-10  | -0.013 | 0.002 |
| 42 | rs9467550   | 6  | 25653401  | G | A | 0.105 | 3.36E-09  | -0.019 | 0.003 |
| 43 | rs143069752 | 6  | 40962537  | A | T | 0.067 | 1.16E-08  | 0.022  | 0.004 |
| 44 | rs9476310   | 6  | 57767576  | T | C | 0.511 | 2.67E-09  | 0.012  | 0.002 |
| 45 | rs1858889   | 7  | 107117447 | C | A | 0.502 | 1.38E-08  | 0.011  | 0.002 |
| 46 | rs2346264   | 7  | 133536351 | C | A | 0.783 | 8.86E-10  | -0.015 | 0.002 |
| 47 | rs7784802   | 7  | 64015379  | T | A | 0.361 | 1.40E-11  | 0.014  | 0.002 |
| 48 | rs17144574  | 7  | 21563471  | C | T | 0.234 | 6.73E-11  | -0.015 | 0.002 |
| 49 | rs41301394  | 7  | 75612803  | T | C | 0.282 | 7.11E-09  | 0.013  | 0.002 |
| 50 | rs57459725  | 8  | 61312205  | G | C | 0.133 | 1.07E-09  | -0.018 | 0.003 |
| 51 | rs804281    | 8  | 11611865  | G | A | 0.584 | 2.48E-15  | 0.016  | 0.002 |
| 52 | rs34726834  | 8  | 25889606  | T | C | 0.252 | 4.49E-11  | 0.015  | 0.002 |
| 53 | rs12056768  | 8  | 116988527 | G | T | 0.583 | 3.27E-28  | -0.022 | 0.002 |
| 54 | rs9409266   | 9  | 125745042 | A | G | 0.861 | 8.74E-11  | -0.018 | 0.003 |
| 55 | rs532436    | 9  | 136149830 | A | G | 0.184 | 1.82E-11  | -0.017 | 0.003 |
| 56 | rs13284054  | 9  | 107669073 | C | T | 0.118 | 1.82E-09  | 0.019  | 0.003 |
| 57 | rs4418728   | 10 | 94839724  | T | G | 0.452 | 7.54E-10  | 0.012  | 0.002 |
| 58 | rs10822145  | 10 | 64934548  | T | C | 0.475 | 1.60E-10  | -0.013 | 0.002 |
| 59 | rs2297991   | 10 | 113913222 | C | T | 0.721 | 3.51E-08  | 0.012  | 0.002 |
| 60 | rs3925446   | 10 | 91495322  | A | G | 0.199 | 3.68E-11  | 0.016  | 0.002 |
| 61 | rs964184    | 11 | 116648917 | C | G | 0.868 | 3.37E-50  | 0.043  | 0.003 |
| 62 | rs1660818   | 11 | 71028249  | A | G | 0.323 | 2.74E-14  | 0.016  | 0.002 |
| 63 | rs116970203 | 11 | 14876718  | A | G | 0.027 | 1.00E-200 | -0.377 | 0.006 |
| 64 | rs12798050  | 11 | 71223256  | T | C | 0.830 | 1.00E-200 | 0.111  | 0.003 |
| 65 | rs2276360   | 11 | 71169547  | C | G | 0.788 | 1.00E-200 | 0.111  | 0.002 |
| 66 | rs113140528 | 11 | 14350665  | T | A | 0.177 | 3.57E-36  | 0.033  | 0.003 |
| 67 | rs36037728  | 11 | 71111987  | T | C | 0.026 | 7.69E-22  | -0.059 | 0.006 |
| 68 | rs7128011   | 11 | 14462532  | A | G | 0.368 | 1.00E-200 | -0.075 | 0.002 |
| 69 | rs10766281  | 11 | 15728444  | G | A | 0.256 | 7.62E-12  | 0.015  | 0.002 |
| 70 | rs575976    | 11 | 75437630  | G | A | 0.182 | 1.06E-09  | 0.016  | 0.003 |
| 71 | rs33981819  | 11 | 66079361  | G | T | 0.461 | 1.20E-08  | 0.011  | 0.002 |
| 72 | rs77037130  | 11 | 14467795  | A | G | 0.015 | 1.55E-17  | -0.068 | 0.008 |
| 73 | rs2847500   | 11 | 120114421 | A | G | 0.124 | 1.22E-13  | -0.022 | 0.003 |
| 74 | rs12317268  | 12 | 21352541  | G | A | 0.151 | 5.27E-14  | -0.021 | 0.003 |
| 75 | rs11182428  | 12 | 38526387  | C | T | 0.520 | 3.17E-10  | -0.012 | 0.002 |
| 76 | rs8181687   | 12 | 68661596  | A | G | 0.579 | 4.00E-09  | 0.012  | 0.002 |
| 77 | rs10859995  | 12 | 96375682  | C | T | 0.583 | 1.11E-89  | -0.040 | 0.002 |
| 78 | rs73413596  | 12 | 111582630 | C | T | 0.074 | 2.89E-10  | 0.024  | 0.004 |
| 79 | rs2171427   | 12 | 24822154  | A | G | 0.155 | 1.81E-08  | -0.015 | 0.003 |
| 80 | rs35014562  | 13 | 55717980  |   | G | 0.281 | 1.01E-08  | -0.013 | 0.002 |
| 81 | rs8018720   | 14 | 39556185  | C | G | 0.823 | 1.95E-50  | -0.038 | 0.003 |
| 82 | rs2756119   | 14 | 104001517 | A | G | 0.383 | 2.35E-09  | 0.012  | 0.002 |

|     |             |    |           |    |   |       |           |        |       |
|-----|-------------|----|-----------|----|---|-------|-----------|--------|-------|
| 83  | rs142004400 | 14 | 50829560  | C  | A | 0.035 | 6.43E-10  | -0.033 | 0.005 |
| 84  | rs62012775  | 15 | 63871274  | T  | A | 0.176 | 2.77E-10  | -0.016 | 0.003 |
| 85  | rs1800588   | 15 | 58723675  | T  | C | 0.215 | 1.50E-43  | -0.033 | 0.002 |
| 86  | rs1532085   | 15 | 58683366  | G  | A | 0.615 | 3.62E-38  | 0.026  | 0.002 |
| 87  | rs2123930   | 15 | 100231033 | A  | G | 0.279 | 1.30E-10  | -0.014 | 0.002 |
| 88  | rs77924615  | 16 | 20392332  | A  | G | 0.193 | 8.09E-09  | -0.014 | 0.003 |
| 89  | rs11542462  | 16 | 82033810  | A  | G | 0.134 | 5.79E-16  | -0.023 | 0.003 |
| 90  | rs8063565   | 16 | 30883965  | C  | G | 0.734 | 2.68E-08  | 0.012  | 0.002 |
| 91  | rs11076175  | 16 | 57006378  | G  | A | 0.178 | 9.46E-21  | 0.024  | 0.003 |
| 92  | rs34177108  | 16 | 89893375  | A  | C | 0.268 | 3.96E-08  | -0.012 | 0.002 |
| 93  | rs2952289   | 17 | 66464414  | T  | C | 0.798 | 3.22E-13  | 0.018  | 0.002 |
| 94  | rs2659007   | 17 | 79217478  | A  | G | 0.451 | 9.75E-09  | 0.011  | 0.002 |
| 95  | rs61003750  | 17 | 40793128  | C  | G | 0.307 | 1.85E-08  | -0.012 | 0.002 |
| 96  | rs12949853  | 17 | 7570878   | A  | G | 0.807 | 1.23E-08  | 0.014  | 0.003 |
| 97  | rs4121823   | 18 | 47144223  | A  | T | 0.845 | 1.33E-11  | -0.019 | 0.003 |
| 98  | rs8091117   | 18 | 28919794  | A  | C | 0.065 | 2.34E-10  | -0.025 | 0.004 |
| 99  | rs2037511   | 18 | 61366207  | A  | G | 0.166 | 1.07E-10  | 0.017  | 0.003 |
| 100 | rs12462826  | 19 | 11955767  | A  | G | 0.369 | 1.52E-10  | -0.013 | 0.002 |
| 101 | rs429358    | 19 | 45411941  | C  | T | 0.152 | 1.76E-17  | -0.023 | 0.003 |
| 102 | rs212100    | 19 | 48376995  | C  | T | 0.836 | 7.83E-136 | -0.066 | 0.003 |
| 103 | rs3814995   | 19 | 36342212  | T  | C | 0.312 | 2.33E-09  | -0.013 | 0.002 |
| 104 | rs200210321 | 19 | 19393890  | AG | A | 0.073 | 9.84E-26  | 0.040  | 0.004 |
| 105 | rs142158911 | 19 | 11190534  | A  | G | 0.115 | 7.17E-18  | 0.027  | 0.003 |
| 106 | rs11606     | 19 | 54658102  | G  | C | 0.425 | 2.77E-08  | 0.011  | 0.002 |
| 107 | rs62115743  | 19 | 51514874  | T  | C | 0.082 | 3.21E-14  | 0.027  | 0.004 |
| 108 | rs1841850   | 20 | 52718179  | C  | A | 0.113 | 2.31E-19  | 0.028  | 0.003 |
| 109 | rs2207132   | 20 | 39142516  | A  | G | 0.033 | 1.96E-12  | -0.039 | 0.005 |
| 110 | rs8121940   | 20 | 52742306  | G  | C | 0.195 | 1.69E-52  | -0.038 | 0.002 |
| 111 | rs2229742   | 21 | 16339172  | C  | G | 0.103 | 5.90E-15  | -0.025 | 0.003 |
| 112 | rs2074735   | 22 | 31535872  | C  | G | 0.064 | 4.00E-12  | 0.028  | 0.004 |
| 113 | rs115621755 | 22 | 50853134  | T  | C | 0.327 | 1.53E-09  | -0.013 | 0.002 |
| 114 | rs6003465   | 22 | 23365501  | C  | T | 0.332 | 1.19E-08  | -0.012 | 0.002 |
| 115 | rs5965373   | X  | 66409433  | G  | T | 0.857 | 1.41E-08  | 0.013  | 0.002 |

Beta is the regression coefficient based on the vitamin D raising allele (effect allele);

SNP: single-nucleotide polymorphism; EA: effect allele; NEA: non-effect allele; EAF:

effect allele frequency; SE: standard error.
